# Supplementary material for: Migrating Curlews on Schedule: Departure and Arrival Patterns of a Long-Distance Migrant Depend on Time Rather than on Wind Conditions
Source: Research Square preprint supplement (doi:10.21203/rs.3.rs-101849/v1), 2020-11-09
Supplement: Supplementary file 1 [file 18d6fdcfe005d7e0f55cf1ca.docx]

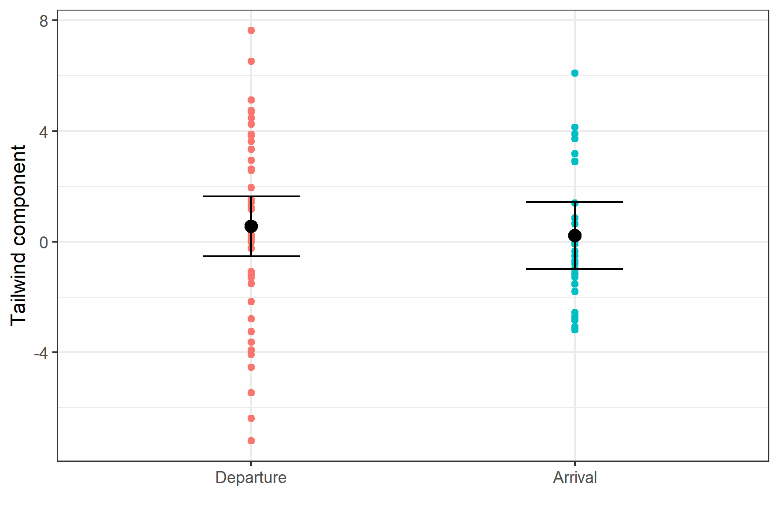

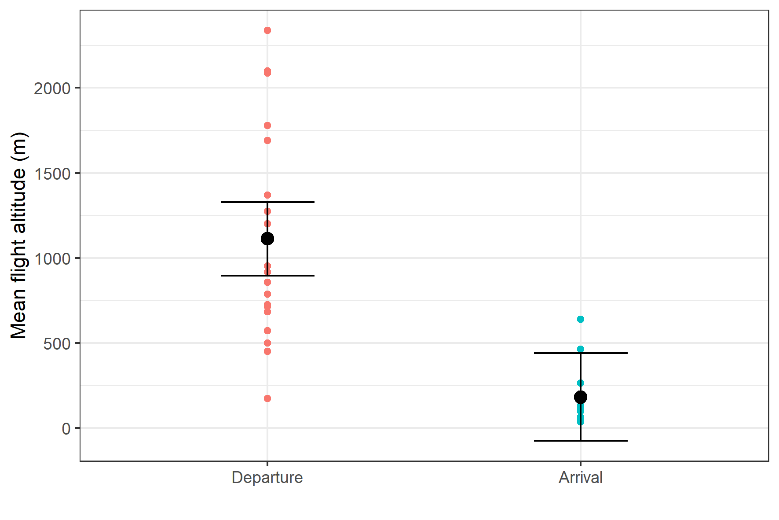

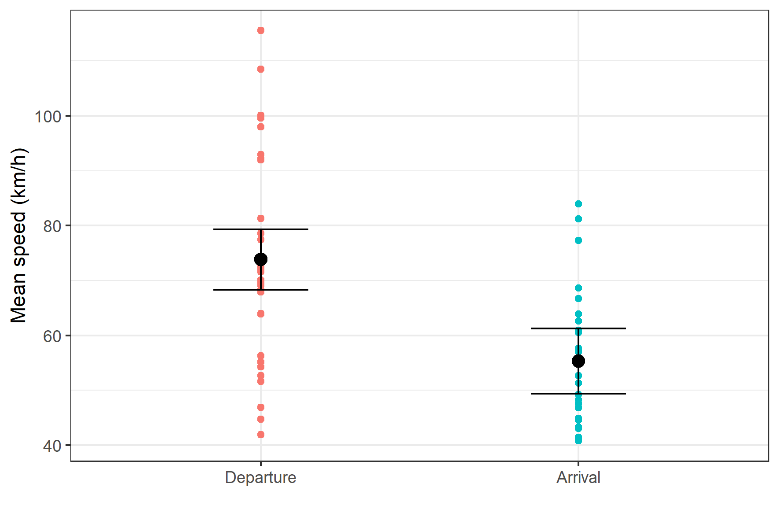

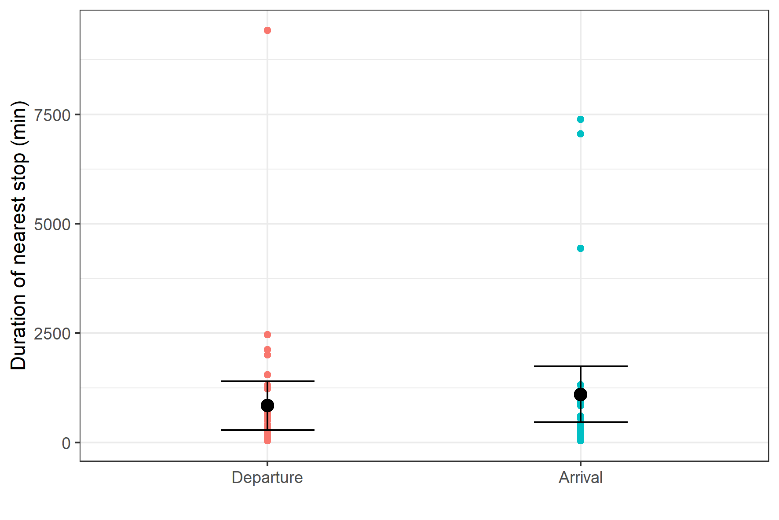

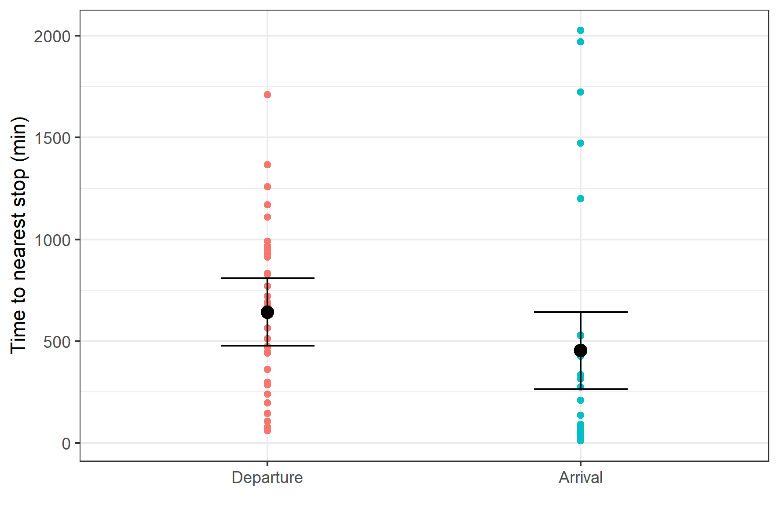

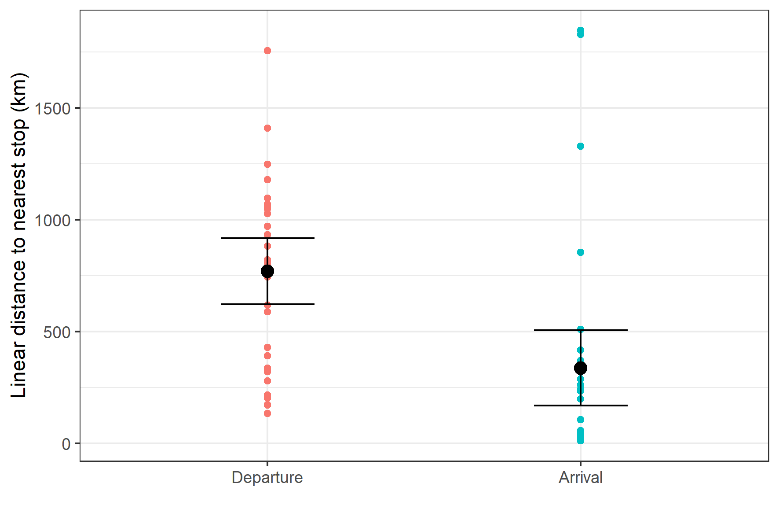

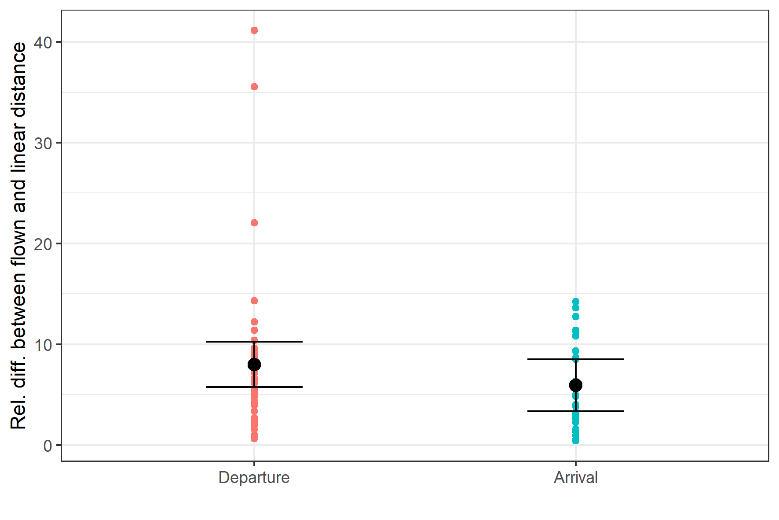

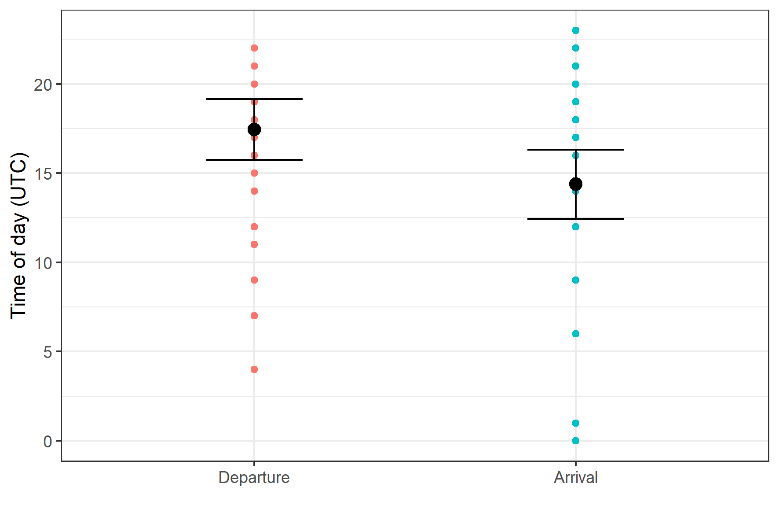
Supplement 1

(h)

(g)

(f)

(e)

(d)

(c)

(b)

(a)


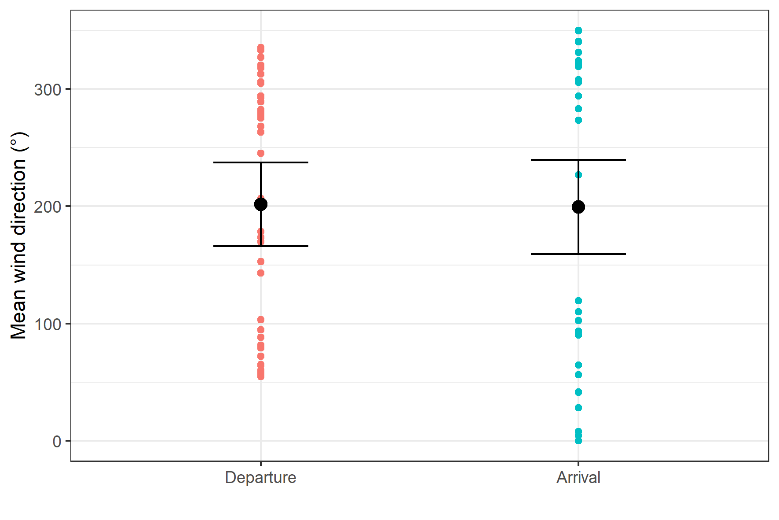

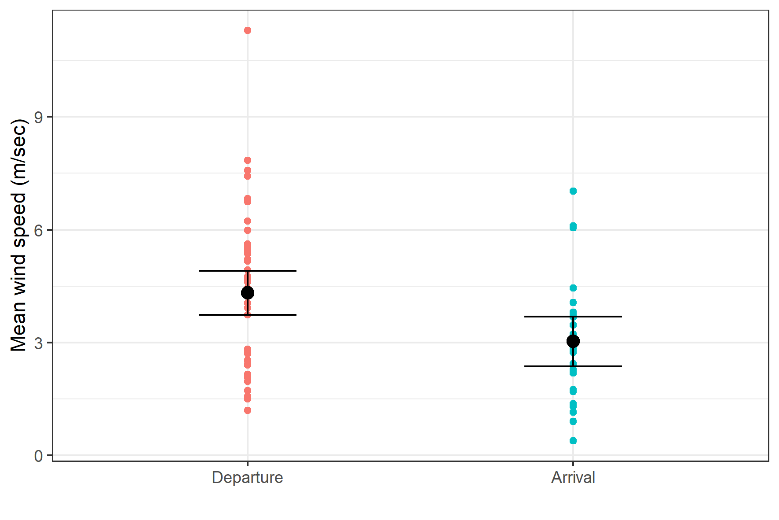
Supplement 1: Differences in time, stop-over parameters, flight altitude, height, tailwind component, and two selected wind variables between departing and arriving curlews. For statistics see Table 1. Bold black dot: mean, black bars: 95% confidence intervals.

(j)

(i)
